# Supplementary material for: An inverse agonist of orphan receptor GPR61 acts by a G protein-competitive allosteric mechanism
Source: PubMed Central journal article supplement (PMC10517971; doi:10.1038/s41467-023-41646-3), 2023-09-23

1 **Supplementary Information**

2 **Supplementary Methods**

3

4 **Compound 1 Selectivity Analyses:**

5 **GPCR selectivity panel:**

6 Adrenergic  $\alpha_1$ , dopamine 1, histamine 1, muscarinic 1, muscarinic 3 and serotonin 2b  
7 receptor activities were measured using FLIPR® Calcium Assays.

8 Cells used in the assay were stably transfected with the receptor of interest (adrenergic  $\alpha_1$ ,  
9 dopamine 1, histamine 1, muscarinic 1, muscarinic 3 and serotonin 2b). Activation of the receptor  
10 by an agonist in this assay system results in an increase in intracellular calcium levels which is  
11 measured using a calcium specific dye. Cells were plated at 7,500 cells per well (50  $\mu$ L per well)  
12 in black walled clear bottomed 384-well plates 24 h prior to running the assay. Medium was  
13 removed from the plates and 80  $\mu$ L of Hanks balanced salt solution (HBSS)/HEPES containing  
14 Calcium 5 dye (Molecular Devices, Sunnyvale CA, USA; Cat # R8186) and probenecid (1.25 mM)  
15 was added to each well and the plate was returned to the incubator for 1 h to allow dye loading.  
16 Compound solution (10  $\mu$ L) was added to each well by the FLIPR Tetra® instrument (Molecular  
17 Devices, Sunnyvale CA, USA) to measure agonist activity of the compound by measuring the  
18 change in fluorescence from baseline over a 60 second period (Excitation 470-495 nm; Emission  
19 515-575 nm). Subsequently 10  $\mu$ L of agonist ( $EC_{80}$  value) was added to each well by the FLIPR  
20 Tetra® instrument to evaluate antagonist activity, with the change in fluorescence from baseline  
21 being measured over a 60 second period.

22 Adrenergic beta 2, cannabinoid 1 and mu opioid receptor activities were measured using Beta-  
23 Arrestin Assays.

24 The beta-arrestin assay relies on enzyme fragment complementation with the respective stably  
25 transfected GPCR (adrenergic beta 2, cannabinoid 1 and mu opioid) being tagged with an inactive  
26 portion of the enzyme  $\beta$ -galactosidase and a co-transfected  $\beta$ -arrestin that is tagged with the  
27 complementary portion of  $\beta$ -galactosidase. Recruitment of  $\beta$ -arrestin to the GPCR, results in a  
28 functional enzyme that generates a chemiluminescent signal when substrate is added. Cells were  
29 plated at 5,000 cells per well (40  $\mu$ L per well) in black walled clear bottomed 384-well plates 24  
30 h prior to running the assay. Medium was removed from the plates. For agonist studies 15  $\mu$ L of  
31 HBSS/HEPES containing compound was added to the cells and the plate was incubated at room  
32 temperature for 90 min. For antagonist studies 15  $\mu$ L of HBSS/HEPES containing compound was  
33 added to the cells and was incubated for 15 min prior to the addition of 15  $\mu$ L of an EC<sub>80</sub>  
34 concentration of agonist. The plate was subsequently incubated at room temperature for 90 min.  
35 Both assays were terminated by addition of 15  $\mu$ L of a Beta-Glo® solution (Promega). Following  
36 an additional 30 min incubation the luminescence of each well was measured to determine the  
37 level of receptor activation.

### 38 **Amine Transporter Assays**

39 The amine transporter assay measures the ability of compounds to inhibit the activity of the  
40 norepinephrine (NET) dopamine (DAT) or serotonin (SERT) transporters by measuring the real  
41 time uptake of a dye labeled amine. HBSS/HEPES containing compound (5  $\mu$ L) was added to the  
42 wells of black walled clear bottomed 384-well plate. Transporter dye (25  $\mu$ L) (Molecular Devices,  
43 Sunnyvale CA, USA; Cat # R8174) was added to each well. Finally, 15,000 cells (20  $\mu$ L) stably  
44 expressing the amine transporter of interest were added to each well and the plate is incubated at

45 37°C for 30 min (DAT) or 60 min (NET and SERT). The plate is transferred to the FLIPR Tetra®  
46 instrument and the fluorescence of each well was measured (Ex 470-495 nM; Em 515-575 nM).  
47 The level of fluorescence measured directly relates to the level of uptake of the dye labelled amine,  
48 with a reduction in levels being related to an inhibition of the respective transporter.

#### 49 **Phosphodiesterase Assays**

50 The phosphodiesterase (PDE) assays measure the conversion of 3', 5'-[3H] cAMP to 5'-[3H] AMP  
51 (for PDE 3A1 and 4D3) or 3', 5'-[3H] cGMP to 5'-[3H] GMP (for 5A1) by the relevant PDE  
52 enzyme subtype. Yttrium silicate (YSi) scintillation proximity (SPA) beads bind selectively to 5'-  
53 [3H] AMP or 5'-[3H] GMP, with the magnitude of radioactive counts being directly related to  
54 PDE enzymatic activity. The assay was performed in white walled opaque bottom 384-well plates.  
55 Test compound (1 µL) in dimethyl sulfoxide was added to each well. Enzyme solution was then  
56 added to each well in buffer (in mM: Trizma, 50 (pH7.5); MgCl<sub>2</sub>, 1.3 mM) containing Brij 35  
57 (0.01% (v/v)). Subsequently, 20 µL of 3',5'-[3H] cGMP (125 nM) or 20 µL of 3',5'-[3H] cAMP  
58 (50 nM) was added to each well to start the reaction and the plate was incubated for 30 min at  
59 25°C. The reaction was terminated by the addition of 20 µL of PDE YSi SPA beads (Perkin Elmer,  
60 Waltham, MA). Following an additional 8 h incubation period the plates were read on a MicroBeta  
61 radioactive plate counter (Perkin Elmer, Waltham, MA, USA) to determine radioactive counts per  
62 well.

#### 63 **Bromodomain-Containing Protein 4 (BRD4) Binding Assay**

64 The BRD4 fluorescent polarization binding assay uses purified His-tagged BRD4 protein and its  
65 interaction with a Cy5 labelled small molecule probe that binds to the BRD4 site involved in the  
66 interaction with tetra-acetylated histone H4 peptide. In brief, the assay is performed in low volume

67 black 384 well flat-bottomed polystyrene plates. Compound/vehicle or standard (5  $\mu$ L) were added  
68 to wells followed by His-tagged BRD4 (10  $\mu$ L; 40 nM final concentration in assay). Following a  
69 15 min incubation at room temperature a proprietary Cy5-labelled probe molecule (5  $\mu$ L; 2 nM  
70 final concentration in assay) was added. Following, an additional 16 h incubation at room  
71 temperature fluorescence polarization measurements were made using an Envision plate reader  
72 (Perkin Elmer, Waltham, MA, USA) and mP values were used for analysis.

### 73 **Acetylcholinesterase Assay**

74 The assay described is based on Ellmans method, in which thiocholine produced by the action of  
75 acetylcholinesterase forms a yellow color with 5,5'-dithiobis(2-nitrobenzoic acid). The intensity  
76 of the product color, measured at 405 nm, is proportionate to the enzyme activity in the sample.  
77 To each well of a clear 96 polystyrene plate 90  $\mu$ L enzyme solution (1mU/well) or phosphate  
78 buffered saline (PBS) and 10  $\mu$ L compound/standard or vehicle was added. The plate was  
79 incubated at room temperature for 15 min. Subsequently 100  $\mu$ L of substrate/detection reagent  
80 (800  $\mu$ M acetylthiocholine/1mM 5,5'-dithiobis(2-nitrobenzoic acid)) was added and the plate was  
81 read at the 20 min time point.

### 82 **hERG Binding Assay**

83 Human embryonic kidney (HEK) cells stably transfected with a doxycycline inducible plasmid  
84 expressing the hERG channel (Accession Number: NM\_000238) were cultured in suspension in  
85 Ex-cell 293 Serum Free Medium containing fetal bovine serum (5% v/v), L-Glutamine (6 mM),  
86 Blastidicin (5  $\mu$ g/ml) and Zeocin (600  $\mu$ g/ml) at 37  $^{\circ}$ C in a humidified environment (5% CO<sub>2</sub>/95%  
87 air). hERG expression was induced by the addition of doxycycline (1  $\mu$ g/ml) 48 h prior to  
88 harvesting by centrifugation. Cell pellets were resuspended in ice cold homogenization buffer (1

89 mM EDTA, 1 mM EGTA, 1 mM NaHCO<sub>3</sub>, and cOmplete™ protease Inhibitor cocktail). Cells  
90 were homogenized using a dounce homogenizer (20 strokes), and centrifuged (1,000xg) for 10  
91 min at 4°C. The supernatant was transferred to a new tube and was centrifuged a second time  
92 (25,000xg) for 20 minutes at 4°C. The supernatant was discarded, and the pellet was resuspended  
93 in buffer (50 mM HEPES, 10 mM MgCl<sub>2</sub>, bovine serum albumin (0.2% w/v) and cOmplete™  
94 protease inhibitor cocktail). The samples were adjusted to 5 mg/ml and frozen. For the assay,  
95 membrane aliquots were thawed on ice and diluted to 200 µg/ml in assay buffer (25 mM HEPES,  
96 15 mM KCl, 1 mM MgCl<sub>2</sub>, and 0.05% (v/v) Pluronic F127). A Cy3B tagged N-desmethyl  
97 dofetilide ligand was prepared in the same assay buffer solution (5 nM). Compound or vehicle  
98 (DMSO) was spotted into each well of a black 384-well low-volume plate. Membrane homogenate  
99 (15 µL) and Cy3B tagged ligand (10 µL) were then added to each well and the plate was incubated  
100 at room temperature for 16 h. Fluorescence polarization measurements were made using an  
101 Envision plate reader (Perkin Elmer, Waltham, MA, USA) and mP values were used for analysis.  
102 Binding K<sub>i</sub> values were determined using the Cheng-Prusoff equation ( $K_i = IC_{50}/(1+L/K_d)$ ), where  
103 L was the labelled ligand concentration in the assay (2 nM), and the K<sub>d</sub> value (1.35 nM) the affinity  
104 constant for the labelled ligand.

### 105 **hERG, Nav1.5 and Cav1.2 Ion Channel Profiling**

106 Ionic currents were evaluated in the whole-cell configuration using the Qube384 automated planar  
107 patch clamp platform (Sophion Bioscience A/S, Ballerup, Denmark). QChip 384X plates,  
108 containing 10 patch clamp holes per well, were used to maximize success rate, which was routinely  
109 > 95%.

110 For hERG experiments, the external solution was composed of (in mM): 132 NaCl, 4 KCl, 1.8  
111 CaCl<sub>2</sub>, 1.2 MgCl<sub>2</sub>, 10 HEPES, 11 Glucose, pH 7.4, 305 mOsm. The internal solution contained (in

112 mM): 15 NaCl, 60 KCl, 1 MgCl<sub>2</sub>, 5 EGTA, 5 HEPES, 70 KF, pH 7.2, 300 mOsM. For Cav1.2  
113 experiments, the external solution was composed of (in mM): 137.9 NaCl, 5.3 KCl, 0.49 MgCl<sub>2</sub>,  
114 10 CaCl<sub>2</sub>, 10 HEPES, 0.34 Na<sub>2</sub>HPO<sub>4</sub>, 4.16 NaHCO<sub>3</sub>, 0.41 MgSO<sub>4</sub>, 5.5 glucose, pH 7.4, 310  
115 mOsM. The internal solution contained (in mM): 27 CF, 112 CsCl, 2 MgCl<sub>2</sub>, 10 EGTA, 10  
116 HEPES, 2 Na<sub>2</sub>ATP, pH 7.2, 305 mOsM. For Nav1.5 experiments (peak current), the external  
117 solution was composed of (in mM): 137.9 NaCl, 5.3 KCl, 0.49 MgCl<sub>2</sub>, 1.8 CaCl<sub>2</sub>, 10 HEPES, 0.34  
118 Na<sub>2</sub>HPO<sub>4</sub>, 4.16 NaHCO<sub>3</sub>, 0.41 MgSO<sub>4</sub>, 5.5 glucose, pH 7.4, and osmolarity of 305 mOsM. The  
119 internal solution contained (in mM): 92 CsF, 55 CsCl, 2 MgCl<sub>2</sub>, 5 EGTA, 5 HEPES, 1 MgATP,  
120 pH 7.2, 300 mOsM.

121 The hERG current was elicited from a holding potential of -80 mV by a voltage step to +40 mV  
122 for 500 ms, followed by a repolarizing ramp to -80 mV at -0.6 mV/ms. This pattern was repeated  
123 at a rate of 0.05 Hz. Peak hERG current was measured during the ramp. The Cav1.2 current was  
124 elicited by a voltage step to 0 mV for 150 ms from a holding potential of -40 mV. Voltage steps  
125 were repeated at 0.05 Hz, and Cav1.2 amplitude was measured as the peak current at 0 mV. For  
126 Nav1.5 current, from a holding potential of -80 mV, a 200 ms prepulse to -120 mV was used to  
127 homogenize channel inactivation, followed by a 40 ms step to a test potential of -15 mV.  
128 Membrane potential was further depolarized to +40 mV for 200 ms to completely inactivate the  
129 peak Nav1.5 current, followed by a ramp from +40 mV to -80 mV (-1.2 mV/ms). This voltage  
130 pattern was repeated at 0.1 Hz, with peak Nav1.5 defined as the maximum current during the step  
131 to -15 mV. All studies were conducted at 23° C.

132 Compounds were dissolved and initially diluted in dimethyl sulfoxide (DMSO), with a final  
133 dilution in external solution to generate final working concentrations. The final DMSO  
134 concentration in all experiments was 0.33% (v/v).

135 For all protocols three vehicle periods each lasting 5 minutes were applied to establish a stable  
136 baseline. For the standard protocol this was followed by the addition of increasing concentrations  
137 of test compound, with each exposure lasting 5 minutes. For the “extended” protocol following  
138 the three-vehicle additional each well subsequently received a single concentration of compound.  
139 This application was repeated three times for each well, via a flowthrough addition where the  
140 solution was replaced with the same compound concentration with each addition. Each exposure  
141 lasted 10 minutes.

142 Patch clamp data were analyzed using Assay Software 6.4.72 (Sophion Bioscience A/S, Ballerup,  
143 Denmark). Current amplitudes were determined by averaging the last 4 currents under each test  
144 condition. The percentage inhibition of each compound was determined by taking the ratio of  
145 current amplitude measured in the presence of various concentrations of the test compound  
146 (ICompound) versus the vehicle control current (IVehicle):

147  $\% \text{ Inhibition} = [1 - (\text{ICompound}/\text{IVehicle})] * 100\%$ .

148 A dose-response curve was generated and fit to the Hill equation by the Sophion Analyzer software  
149 to determine an IC<sub>50</sub> value for each compound. The minimum and the slope of the fit were free  
150 fitted, with the top being fixed to 100% inhibition.

### 151 **GABA Patch Clamp Assay**

152 Compound effects on the human GABA<sub>A</sub> receptor ( $\alpha 1\beta 2\gamma 2$ ), stably expressed in human embryonic  
153 kidney (HEK) cells, were examined in three modes of action: agonist, antagonist and positive  
154 allosteric modulation (PAM) modes. Chloride currents evoked by the activation of the GABA<sub>A</sub>  
155 receptor were recorded in the whole-cell patch clamp configuration with the automated Qube384®  
156 platform (Sophion Bioscience A/S, Baltorpvej, Denmark). The intracellular solution contained (in

157 mM): CsF 90, CsCl 50, MgCl<sub>2</sub> 2 EGTA 10, HEPES 10, pH adjusted to 7.2 with CsOH. The  
158 extracellular solution contained (in mM): NaCl 138, KCl 5.3, CaCl<sub>2</sub> 5, MgCl<sub>2</sub> 0.49, HEPES 10,  
159 glucose 5.5, Na<sub>2</sub>HPO<sub>4</sub> 0.34, NaHCO<sub>3</sub> 4.16, MgSO<sub>4</sub> 0.41, pH adjusted to 7.4 with NaOH. The  
160 osmolarity of the internal and external solutions were adjusted with sucrose to 300 mOsm and 305  
161 mOsm, respectively.

162 Compounds were dissolved and initially diluted in dimethyl sulfoxide (DMSO), with a final  
163 dilution in external solution to generate final working concentrations. The final DMSO  
164 concentration in all experiments was 0.33% (v/v).

165 Cells and solutions were loaded into the Qube384 10X Qchip (10 recording wells per well, 384  
166 wells per QChip). After whole-cell configuration was achieved by negative pressure pulse, cells  
167 were maintained at a holding potential of -80 mV throughout the experiment. To avoid  
168 desensitization and current rundown due to persistent activation of GABA<sub>A</sub>, a “stacked pipette”  
169 approach was utilized to ensure only a brief exposure of the cells to GABA-containing solutions.  
170 In this approach, the perfusion pipettes drew from two liquid sources, first from extracellular  
171 solution (14 μL), and next from a GABA-containing solution (7 μL). When dispensed into the  
172 wells, this resulted in an exposure to GABA lasting 0.8 s, followed by immediate washout by  
173 extracellular solution. At the start of the experiment, a baseline GABA<sub>A</sub> current was established  
174 for each well in response to activation by 40 μM GABA. Each subsequent test condition was  
175 normalized against this baseline GABA current on a per well basis.

176 Agonist effects were measured by recording the current evoked by the test article in the absence  
177 of GABA. Agonism (%) was calculated relative to the current produced by 40 μM GABA for  
178 each well: [% Agonism = ( $I_{\text{test article}} / I_{40\mu\text{M GABA}}$ ) \* 100%].



179 Antagonist effects of test article were examined in the presence of 40  $\mu$ M GABA following a 4  
180 min incubation in test article. Antagonism was calculated relative to the current produced by 40  
181  $\mu$ M GABA for each well [% Antagonism =  $(I_{\text{test article, 40}\mu\text{M GABA}} / I_{40\mu\text{M GABA}}) * 100\%$ ]. Positive  
182 allosteric modulation (%) by test article was detected when current was enhanced relative to the  
183 40  $\mu$ M GABA normalization current.

184  $EC_{50}/IC_{50}$  values were calculated by fitting concentration response curve data to a 4-parameter  
185 logistic regression equation [% effect =  $\text{Bottom} + (\text{Top}-\text{Bottom}) / (1 + 10^{((\text{Log}IC_{50}-$   
186  $\text{Concentration}) * \text{HillSlope}))$ ].

187

## 188 **Data Analysis**

189 Agonist/antagonist curves were plotted from individual experiments, and  $EC_{50}/IC_{50}$  values were  
190 determined using a four-parameter logistic fit.  $EC_{50}$  is defined as the concentration of the test  
191 article that produced a response that was equal to 50% of the maximal system response.  $IC_{50}$  is  
192 defined as the concentration of the test article that produced a 50% inhibition of a maximal  
193 response. An apparent  $K_B$  value for antagonist activity was calculated using the following  
194 equation:

$$195 \text{ Apparent } K_B = IC_{50} / (1 + ([A] / \text{Agonist } EC_{50}))$$

196 where the  $K_B$  value is the dissociation constant of antagonist for the receptor,  $IC_{50}$  is the response  
197 produced by the test article in the presence of [A], the concentration of agonist used in the assay.  
198 Agonist  $EC_{50}$  is the  $EC_{50}$  value of the reference agonist used in the assay when tested alone.

199

200 **Supplementary Materials**

201 **Supplementary Table 1: Compound 1 Selectivity.** Stimulatory and/or inhibitory activity of  
202 compound 1 against a panel of drug safety target assays.

203 **Supplementary Table 2: Compound 1 and HPE Compound Selectivity.** Potency data for  
204 inhibition of GPR61, GPR62, and GPR101 by compound 1, as well as by a non-specific inhibitor  
205 used to define hundred-percent effect (HPE) for IC<sub>50</sub> assays. SEM, 95% CI, and N are as indicated  
206 in the table.

207 **Supplementary Table 3: Conformational Energetics of Compound 1.** Select dihedral angle  
208 differences between the global minimum conformation of compound 1 and the bound cryo-EM  
209 conformation with estimated energy differences based on the OPLS4 force field.

210 **Supplementary Table 4: Cryo-EM Data Collection, Processing, and Refinement Statistics.**

211 **Supplementary Note 1: Compound 1 Characterization Data.** Measurements derived from <sup>1</sup>H,  
212 <sup>13</sup>C, and <sup>19</sup>F NMR spectra for Compound 1, as well as the calculated and measured mass from  
213 analysis by high-resolution mass spectrometry (HRMS).

214 **Supplementary Figure 1: Expression and Constitutive Activity of GPR61 Mutants.** a. Total  
215 cellular expression of wild-type GPR61 vs. point mutants in ECL2 and the TM6/7 disulfide. b.  
216 Cell surface expression of Hibit-tagged GPR61 wild-type and mutants as percentage of wild-type  
217 total expression. c. Cell surface expression of Hibit-tagged GPR61 wild-type and mutants as a  
218 percentage of wild-type cell surface expression. d. Basal cAMP activity of GPR61 mutants as a  
219 percentage of wild-type cAMP activity (untagged or Hibit-tagged). e. Cell surface expression-  
220 normalized basal cAMP activity of GPR61 mutants as a percentage of normalized wild-type cAMP  
221 activity (untagged or Hibit-tagged). For all panels, bar plots and error bars represent the mean ±

222 S.E.M. For panels a-c, N = 4 independent experiments. For panels d-e, N = 3 independent  
223 experiments. Asterisks indicate significance (\*p ≤ 0.05, \*\*p ≤ 0.01, \*\*\*p ≤ 0.001), which was  
224 assessed using one-way ANOVA with one-sided Dunnett's post hoc test. Source data are provided  
225 as a Source Data file.

226 **Supplementary Figure 2: Compound 1 Synthesis Scheme.** The synthetic route used for the  
227 production of compound 1 is shown.

228 **Supplementary Figure 3: AlphaFold-guided GPR61-BRIL Construct Design.** a. General  
229 schematic for designing constructs. BRIL was fused, with or without linker sequences, to replace  
230 intracellular loop 3 of GPR61 for continuous helical extensions to GPR61 TM5 and TM6. b.  
231 General workflow for AlphaFold-based screening of constructs. AlphaFold predictions were used  
232 to bin construct designs based on the quality of helical fusions to TM5 and TM6 of GPR61.  
233 Predictions with relatively straight, helical fusions for both helices were selected for screening by  
234 cryo-EM. Cryo-EM screening enabled identification of a construct suitable for scale-up and full  
235 3D reconstruction.

236 **Supplementary Figure 4: Cell Surface Expression of GPR61 Wild-Type vs. BRIL Fusion.** a.  
237 Schematic indicating how cells are binned based on their positions of the quadrants of Guava flow  
238 cytometry. Higher red fluorescence (y-axis) indicates cell death, while higher green (Alexa 488)  
239 fluorescence (x-axis) indicates higher receptor expression. Live fluorescent cells (lower right  
240 quadrant) are indicative of GPR61 cell surface expression. b. Guava results for GPR61-IA and  
241 GPR61 wild-type overexpressed in Sf9 insect cells. Column 1 represents cells in the absence of  
242 the anti-HA antibody, column 2 represents cells treated with the Alexa 488 antibody to indicate  
243 surface GPR61 expression level, and column 3 represents cells treated with the antibody and Triton  
244 X-100 to indicate total cellular GPR61 expression level. c. Percentage of live cells positive for

245 GPR61 cell surface expression with the two GPR61 constructs. d. Mean Alexa 488 fluorescence  
246 intensity for cell surface expression of the two GPR61 constructs. N = 1 independent experiment.

247 **Supplementary Figure 5: Compound 1 Protein-Ligand Interactions.** Residues proximal to  
248 compound 1 in the cryo-EM structure are indicated by labels. Green arrows indicate hydrogen  
249 bonds, with the arrow pointing from donor to acceptor.

250 **Supplementary Figure 6: Basal Activity and Surface Expression of Compound 1 Binding**  
251 **Site Mutants.** a. Relative basal activity of untagged vs. HiBit-tagged GPR61 WT and mutants. b.  
252 Relative surface expression of GPR61 WT and mutants. Bar plots and error bars represent the  
253 mean  $\pm$  S.E.M. N = 3 independent experiments. Statistical significance is indicated with asterisks  
254 ( $*p \leq 0.05$ ,  $**p \leq 0.01$ ,  $***p \leq 0.001$ ) and was assessed using one-way ANOVA with one-sided  
255 Dunnett's post hoc test. Source data are provided as a Source Data file.

256 **Supplementary Figure 7: Compound 1 Energy Calculations.** a. Energy profile of the  
257 difluoropyridyl tail dihedral angle 1. Dihedral angles of the global minimum conformation  
258 ( $236.0^\circ$ ) and the cryo-EM conformation ( $255.3^\circ$ ) are indicated by the solid and dashed lines,  
259 respectively. b. 2D energy profile of the amine dihedral angles 2 and 3. The magenta circle  
260 indicates the global minimum conformation ( $74.9^\circ$  and  $0.3^\circ$ , respectively) and the gray star  
261 indicates the cryo-EM conformation ( $122.1^\circ$  and  $330.2^\circ$ , respectively). c. Energy profile of the  
262 sulfonamide dihedral angle 4. Dihedral angles of the global minimum conformation ( $125.9^\circ$ ) and  
263 the cryo-EM conformation ( $106.7^\circ$ ) are indicated by the solid and dashed lines, respectively.

264 **Supplementary Figure 8: Multiple Sequence Alignment of Receptors Used for Selectivity**  
265 **Analyses and Other Biogenic Amine Receptors.** Gene names of receptors used in selectivity  
266 analyses are underlined in green and GPR61 is underlined in magenta. Residues of GPR61 making

267 key polar interactions with Compound 1 are highlighted on the alignment by red boxes. Other  
268 residues lining the Compound 1 binding pocket are highlighted by blue boxes. Multiple sequence  
269 alignment was generated using ClustalW and visualization was created using BoxShade v.3.3.

270 **Supplementary Figure 9: Cryo-EM Data Processing Workflow for Active-State GPR61-**  
271 **dnGas/i chimera-G $\beta$  $\gamma$ .** a. Data processing workflow. b. Fourier shell correlation curves from  
272 gold-standard refinement and particle angular distribution. c. Cryo-EM map colored by local  
273 resolution. d. GPR61 TM helices fitted into the cryo-EM map.

274 **Supplementary Figure 10: Cryo-EM Data Processing Workflow for GPR61<sub>1A</sub> + Compound**  
275 **1.** a. Data processing workflow. b. Fourier shell correlation curves from gold-standard refinement  
276 and particle angular distribution. c. Cryo-EM map colored by local resolution. d. GPR61 TM  
277 helices fitted into the cryo-EM map. e. Fitted model of compound 1 in its binding site with map  
278 density from two vantage points. Map is contoured at  $5\sigma$ .

279 **Supplementary Figure 11: Cryo-EM Data Processing Workflow for Apo-GPR61<sub>1A</sub>.** a. Data  
280 processing workflow. b. Fourier shell correlation curves from gold-standard refinement and  
281 particle angular distribution. c. Cryo-EM map colored by local resolution. d. GPR61 TM helices  
282 fitted into the cryo-EM map.

283

284 **Supplementary Table 1**

| <b>Compound 1 GPCR Selectivity</b>             |                          |                             |                  |                      |
|------------------------------------------------|--------------------------|-----------------------------|------------------|----------------------|
| <b>GPCR Target</b>                             | <b>Agonist EC50 (nM)</b> | <b>Antagonist IC50 (nM)</b> |                  |                      |
| Alpha adrenergic receptor 1a                   | >10,000                  | >10,000                     |                  |                      |
| Beta-2 adrenergic receptor                     | >10,000                  | >10,000                     |                  |                      |
| Cannabinoid receptor 1                         | >10,000                  | >10,000                     |                  |                      |
| Dopamine receptor 1                            | >10,000                  | >10,000                     |                  |                      |
| Histamine receptor 1                           | >10,000                  | >10,000                     |                  |                      |
| Mu opioid receptor                             | >10,000                  | >10,000                     |                  |                      |
| Serotonin receptor 2b                          | >10,000                  | >10,000                     |                  |                      |
| Muscarinic receptor 1                          | >10,000                  | >10,000                     |                  |                      |
| Muscarinic receptor 3                          | >10,000                  | >10,000                     |                  |                      |
| <b>Transporter Targets</b>                     |                          |                             |                  |                      |
|                                                | <b>IC50 (nM)</b>         |                             |                  |                      |
| Serotonin Transporter                          | >10,000                  |                             |                  |                      |
| Norepinephrine Transporter                     | >10,000                  |                             |                  |                      |
| Dopamine Transporter                           | >10,000                  |                             |                  |                      |
| <b>Phosphodiesterase Targets</b>               |                          |                             |                  |                      |
|                                                | <b>IC50 (nM)</b>         |                             |                  |                      |
| Human PDE1B1                                   | >40000                   |                             |                  |                      |
| Human PDE2A1                                   | >200000                  |                             |                  |                      |
| Human PDE3A1                                   | 18357                    |                             |                  |                      |
| Human PDE4D3                                   | >35018                   |                             |                  |                      |
| Human PDE5A1                                   | 154918                   |                             |                  |                      |
| Bovine PDE6                                    | >200000                  |                             |                  |                      |
| Human PDE7B                                    | 6273                     |                             |                  |                      |
| Human PDE8B                                    | 9071                     |                             |                  |                      |
| Human PED9A1                                   | >200000                  |                             |                  |                      |
| Human PDE10A1                                  | >40000                   |                             |                  |                      |
| Human PDE11A4                                  | >40000                   |                             |                  |                      |
| <b>Epigenetic Targets</b>                      |                          |                             |                  |                      |
|                                                | <b>IC50 (nM)</b>         |                             |                  |                      |
| BRD4 (Binding)                                 | >25000                   |                             |                  |                      |
| <b>Enzyme Targets</b>                          |                          |                             |                  |                      |
|                                                | <b>IC50 (nM)</b>         |                             |                  |                      |
| Acetylcholinesterase                           | >50000                   |                             |                  |                      |
| <b>Ion Channel Targets</b>                     |                          |                             |                  |                      |
|                                                | <b>Patch IC50 (nM)</b>   | <b>Binding Ki (nM)</b>      |                  |                      |
| hERG                                           | 52904                    | >80000                      |                  |                      |
| <b>Ion Channel Targets</b>                     |                          |                             |                  |                      |
|                                                | <b>%Activation@10µM</b>  | <b>%Inhibition@10µM</b>     | <b>EC50 (nM)</b> | <b>PAM EC50 (nM)</b> |
| GABAa                                          | 0                        | 4                           | >100000          | >100000              |
| <b>Ion Channel Targets</b>                     |                          |                             |                  |                      |
|                                                | <b>IC50 (nM)</b>         |                             |                  |                      |
| Calcium Channel Cav1                           | 44787                    |                             |                  |                      |
| Sodium Channel Nav1                            | >100000                  |                             |                  |                      |
| Sodium Channel Nav1.5 (Peak)                   | >100000                  |                             |                  |                      |
| <b>Ion Channel Extended Protocol IC50 (nM)</b> |                          |                             |                  |                      |
|                                                |                          | <b>Period</b>               |                  |                      |
|                                                |                          | <b>1st</b>                  | <b>2nd</b>       | <b>3rd</b>           |
| hERG                                           |                          | 36519                       | 28050            | 18705                |
| Cav1.2                                         |                          | 21061                       | 10729            | 5926                 |
| Nav1.5 (Peak)                                  |                          | >100000                     | >100000          | >100000              |

285

286

287 **Supplementary Table 2**

|                     |                                | <b>GPR61</b> | <b>GPR62</b> | <b>GPR101</b>   |
|---------------------|--------------------------------|--------------|--------------|-----------------|
| <b>Compound 1</b>   | <b>IC<sub>50</sub> (μM)</b>    | 0.021        | 17.795       | >29.741         |
|                     | <b>95% confidence interval</b> | 0.013-0.036  | 6.487-48.809 | >29.085->30.412 |
|                     | <b>Std Dev</b>                 | 1.654        | 7.071        | 1.021           |
|                     | <b>N</b>                       | 6            | 4            | 6               |
| <b>HPE Compound</b> | <b>IC<sub>50</sub> (μM)</b>    | 1.896        | 1.569        | 1.863           |
|                     | <b>95% confidence interval</b> | 1.722-2.087  | 0.863-2.852  | 1.683-2.063     |
|                     | <b>Std Dev</b>                 | 1.901        | 1.767        | 1.946           |
|                     | <b>N</b>                       | 175          | 6            | 168             |

288

289 **Supplementary Table 3**

| <b>Dihedral Angle Name</b>                        | <b>Cryo-EM Dihedral Angle (°)</b> | <b>Global Minimum Dihedral Angle (°)</b> | <b>ΔG (kcal/mol)</b> |
|---------------------------------------------------|-----------------------------------|------------------------------------------|----------------------|
| Difluoropyridyl tail torsion <b>1</b> (NH-C-C-CF) | 255.2                             | 236.0                                    | 0.6                  |
| Amine torsion <b>2</b>                            | 122.1                             | 74.9                                     | 4.9                  |
| Amine torsion <b>3</b>                            | 330.2                             | 0.3                                      |                      |
| Sulfonamide torsion <b>4</b>                      | 106.7                             | 125.9                                    | 2.2                  |

290

291

292 **Supplementary Table 4. Cryo-EM data collection, refinement and validation statistics**

|                                                  | GPR61-dnG $\alpha$ s/i chimera-G $\beta$ $\gamma$ (EMD-41144) (PDB 8TB0) | GPR61-BRIL+ Compound 1 (EMD-41145) (PDB 8TB7) | GPR61-BRIL apo  |
|--------------------------------------------------|--------------------------------------------------------------------------|-----------------------------------------------|-----------------|
| <b>Data collection and processing</b>            |                                                                          |                                               |                 |
| Magnification                                    | 215,000x                                                                 | 215,000x                                      | 215,000x        |
| Voltage (kV)                                     | 300                                                                      | 300                                           | 300             |
| Electron exposure (e-/Å <sup>2</sup> )           | 50                                                                       | 50                                            | 50              |
| Defocus range (μm)                               | -2.4 to -0.6                                                             | -2.4 to -0.6                                  | -2.4 to -0.6    |
| Pixel size (Å)                                   | 0.59                                                                     | 0.59                                          | 0.59            |
| Symmetry imposed                                 | C1                                                                       | C1                                            | C1              |
| Initial particle images (no.)                    | 2,768,397                                                                | 4,736,846                                     | 2,955,528       |
| Final particle images (no.)                      | 52,887                                                                   | 170,451                                       | 92,842          |
| Map resolution (Å)                               | 3.47                                                                     | 2.90                                          | 3.97            |
| FSC threshold                                    | (0.143)                                                                  | (0.143)                                       | (0.143)         |
| Map resolution range (Å)                         |                                                                          | 5.85-2.60                                     |                 |
| <b>Refinement</b>                                |                                                                          |                                               |                 |
| Initial model used (PDB code)                    | AF_AFQ9BZJ8F1, 3SN6                                                      | AlphaFold, 6WW2                               | AlphaFold, 6WW2 |
| Model resolution (Å)                             | 3.8                                                                      | 3.1                                           | 4.0             |
| FSC threshold                                    | 0.5                                                                      | 0.5                                           | 0.5             |
| Model resolution range (Å)                       |                                                                          |                                               |                 |
| Map sharpening <i>B</i> factor (Å <sup>2</sup> ) | 82.7                                                                     | 100.5                                         | 103.1           |
| Model composition                                |                                                                          |                                               |                 |
| Non-hydrogen atoms                               | 8,467                                                                    | 6,809                                         | 6,304           |
| Protein residues                                 | 1,090                                                                    | 882                                           | 399             |
| Ligands                                          | 0                                                                        | 1                                             | 0               |
| <i>B</i> factors (Å <sup>2</sup> )               |                                                                          |                                               |                 |
| Protein                                          | 65.52                                                                    | 61.66                                         | 234.12          |
| Ligand                                           | N/A                                                                      | 89.02                                         | N/A             |
| R.m.s. deviations                                |                                                                          |                                               |                 |
| Bond lengths (Å)                                 | 0.003                                                                    | 0.003                                         | 0.034           |
| Bond angles (°)                                  | 0.648                                                                    | 0.613                                         | 1.147           |
| Validation                                       |                                                                          |                                               |                 |
| MolProbity score                                 | 1.85                                                                     | 1.65                                          | 2.28            |
| Clashscore                                       | 8.75                                                                     | 5.42                                          | 23.32           |
| Poor rotamers (%)                                | 0.11                                                                     | 0                                             | 0               |
| Ramachandran plot                                |                                                                          |                                               |                 |
| Favored (%)                                      | 94.37                                                                    | 94.76                                         | 93.70           |
| Allowed (%)                                      | 5.63                                                                     | 5.24                                          | 6.05            |
| Disallowed (%)                                   | 0                                                                        | 0                                             | 0.25            |

293

294



295 **Supplementary Note 1**

296 **Compound 1 Characterization Data**

297  $^1\text{H}$  NMR (400 MHz, DMSO- $d_6$ )  $\delta$  ppm 8.47 (s, 2H), 8.17 (br s, 1H), 7.89 (d,  $J = 8.4$  Hz, 1H),  
298 6.26 (s, 1H), 6.21 (d,  $J = 8.4$  Hz, 1H), 4.63 (d,  $J = 6.1$  Hz, 2H), 4.21 (t,  $J = 7.1$  Hz, 2H), 4.11 (q,  
299  $J = 6.9$  Hz, 2H), 3.79 (s, 3H), 3.63 (t,  $J = 7.1$  Hz, 2H), 2.18 (s, 3H), 1.18 (t,  $J = 7.1$  Hz, 3H).

300  $^{13}\text{C}$  NMR (101 MHz, DMSO- $d_6$ )  $\delta$  ppm 168.95, 167.69, 159.45, 159.24, 157.42 (dd,  $J = 259.78$ ,  
301 3.27 Hz), 157.13, 141.87, 134.14 (dd,  $J = 22.2$ , 6.1 Hz,) 123.38 (t,  $J = 15.2$  Hz), 108.16, 100.18,  
302 99.60, 70.29, 62.14, 58.05, 53.29, 45.73, 32.60, 23.27, 14.00.

303  $^{19}\text{F}$  NMR (377 MHz, DMSO- $d_6$ )  $\delta$  -129.57.

304 HRMS calculated for  $\text{C}_{22}\text{H}_{27}\text{F}_2\text{N}_6\text{O}_5\text{S}$   $[\text{M}+\text{H}]^+$  525.1726, found 525.1715.

305

# Supplementary Figure 1

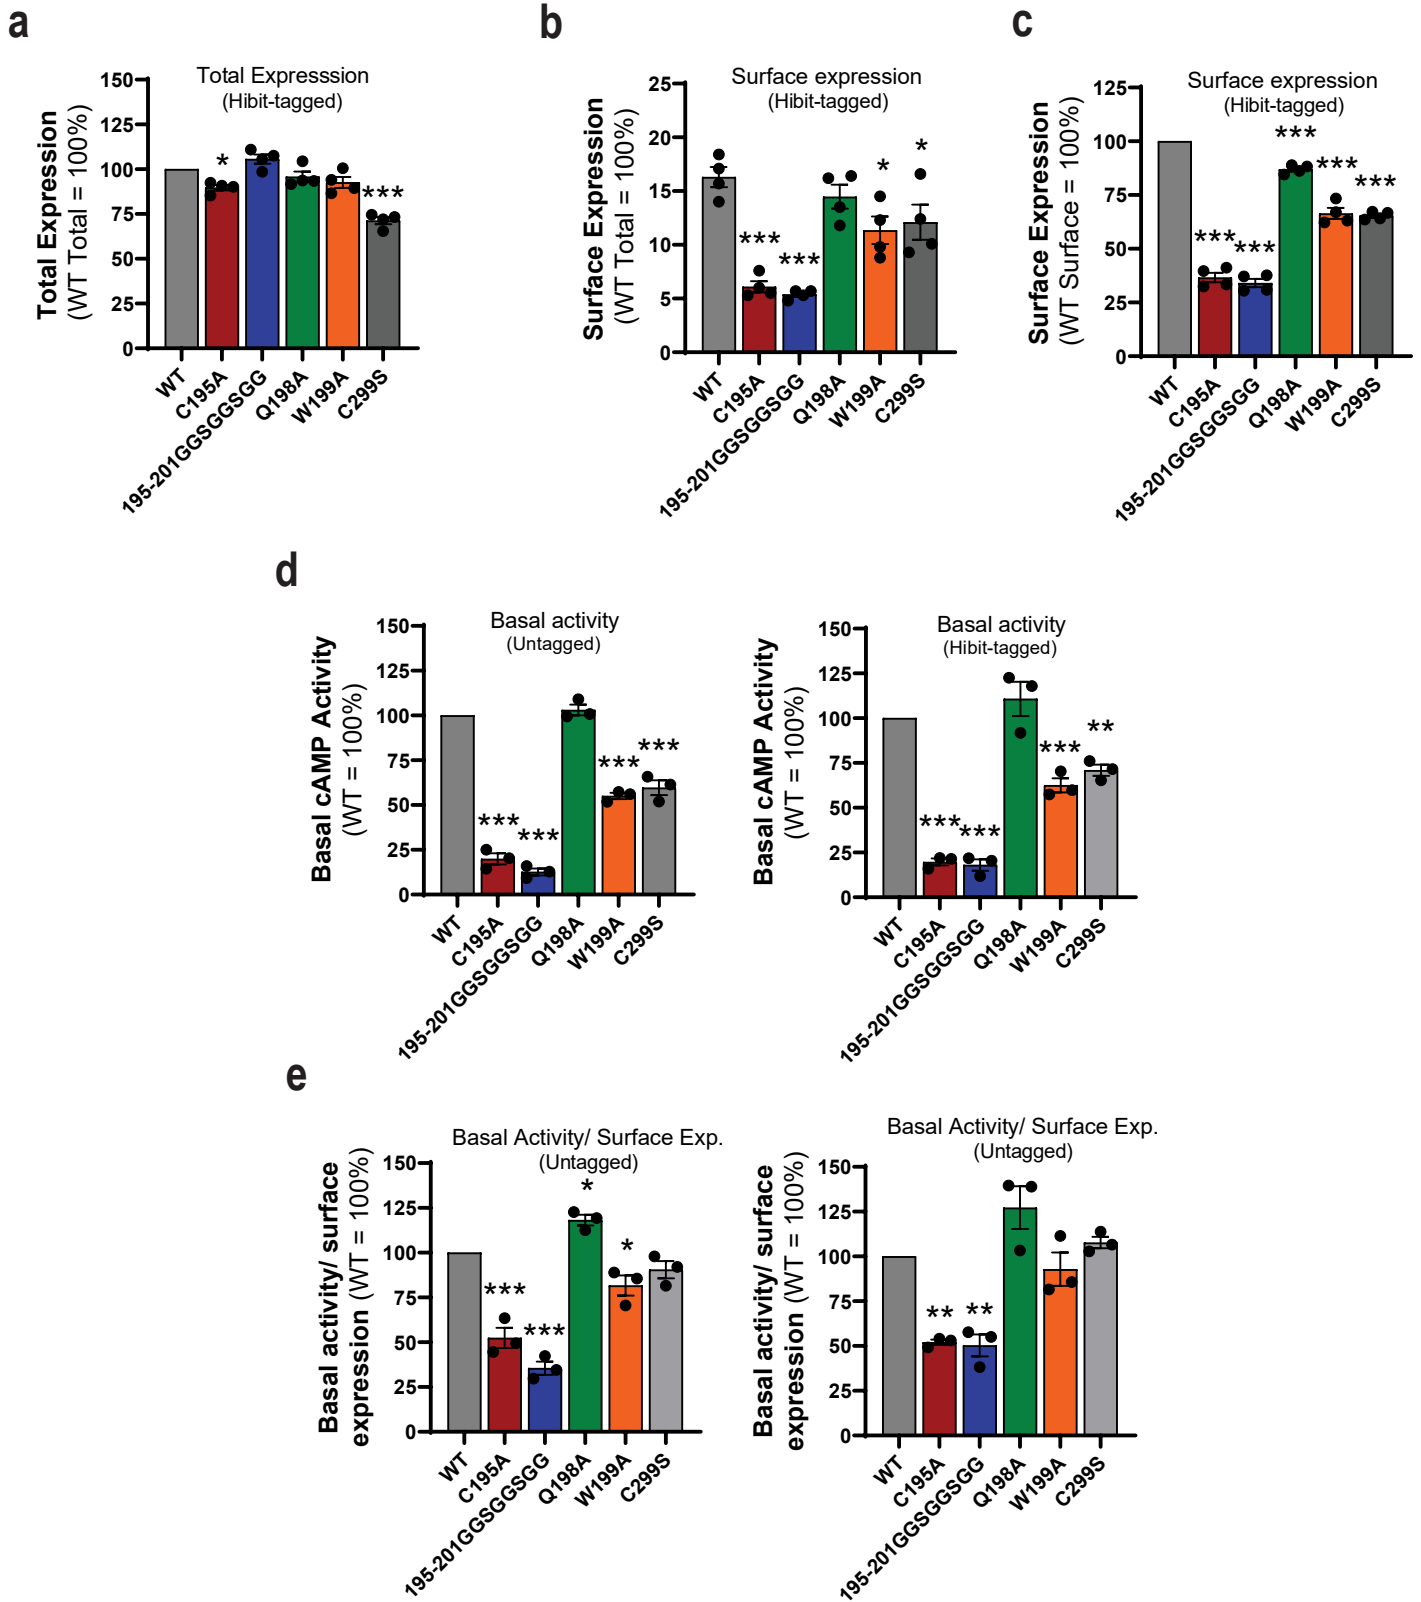

# Supplementary Figure 2

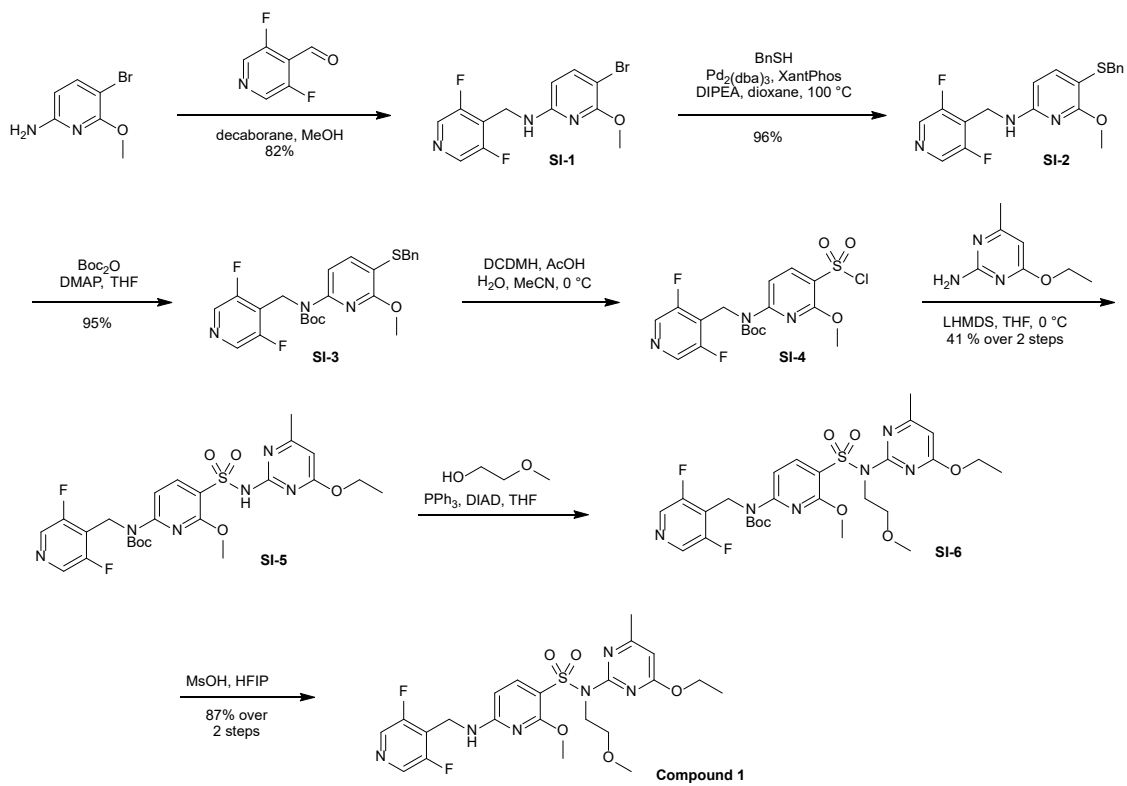

# Supplementary Figure 3

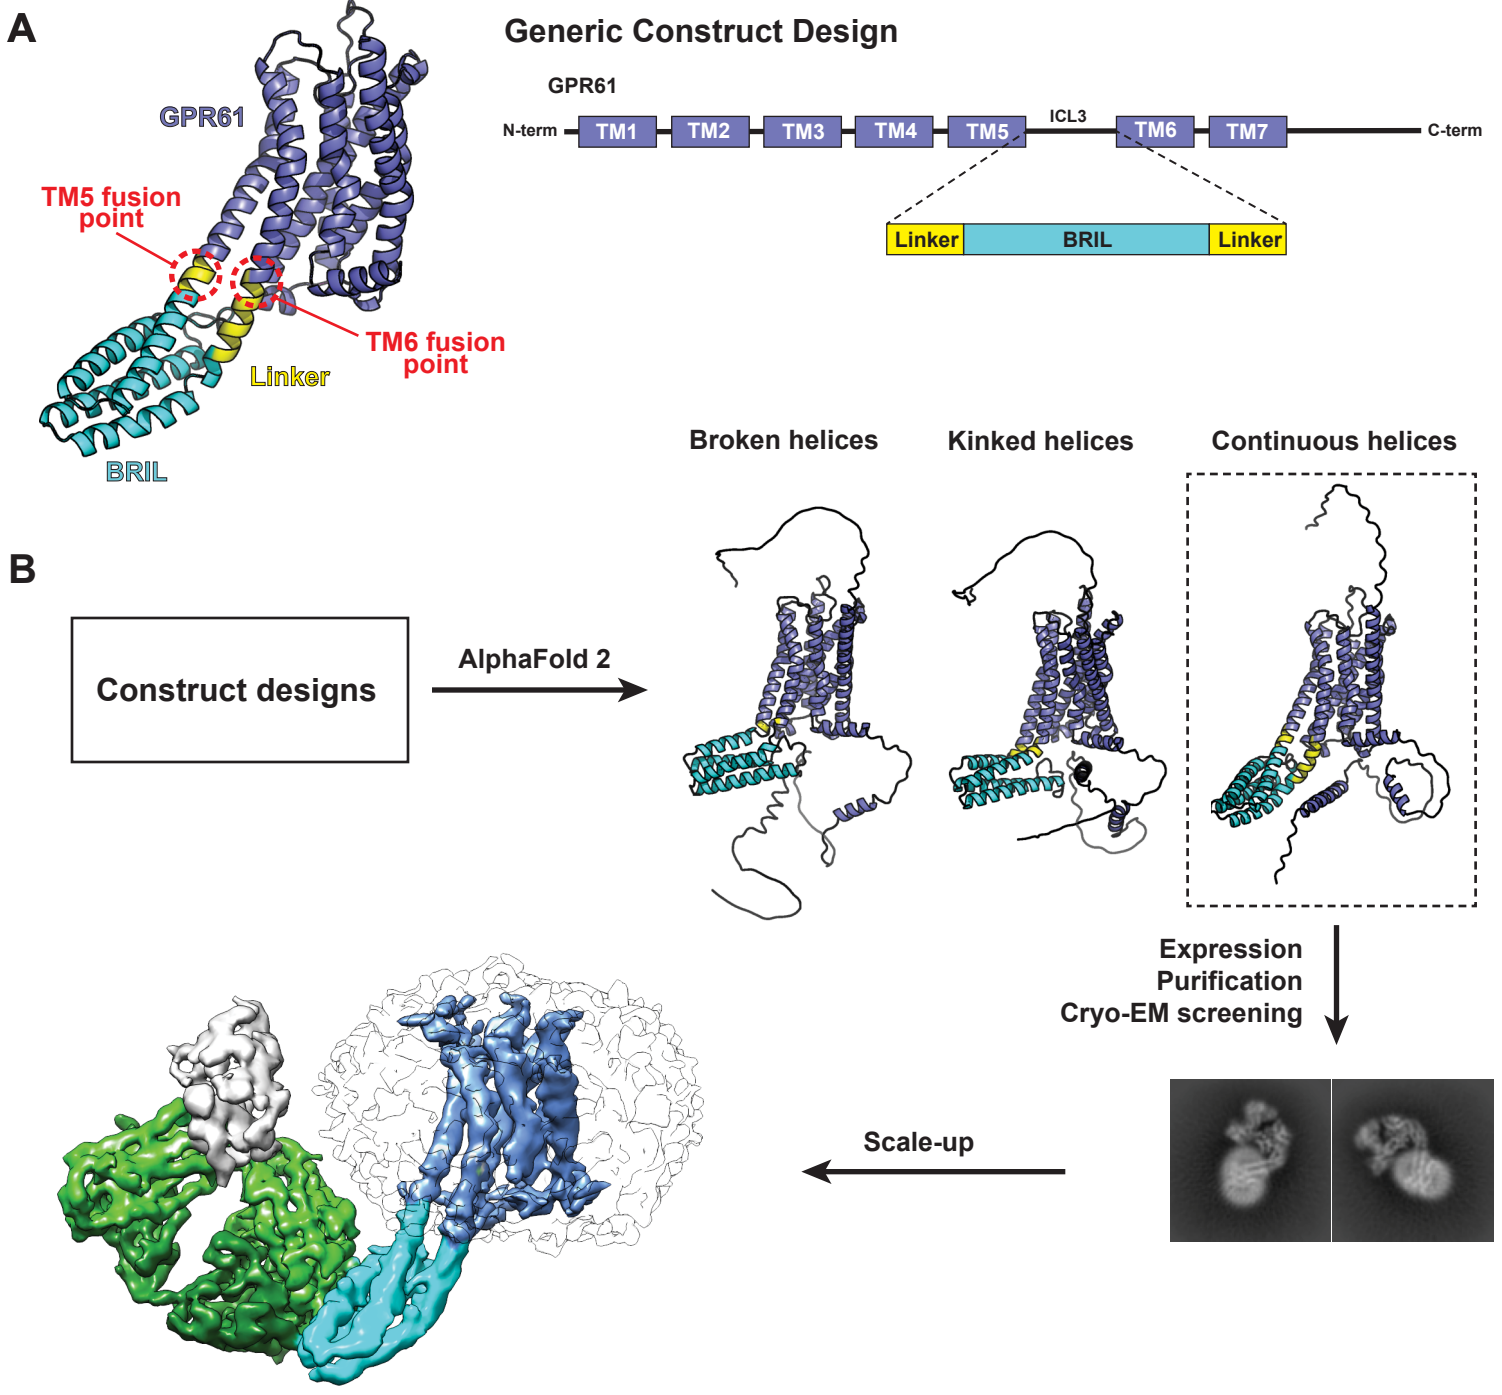

# Supplementary Figure 4

**a**

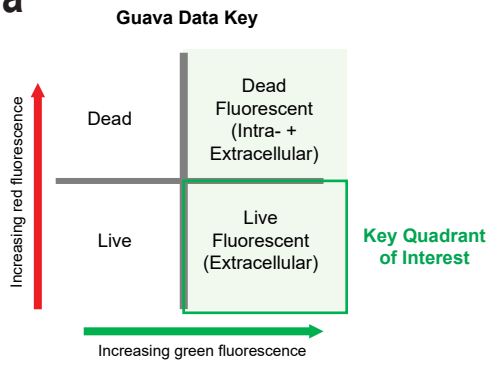

**b**

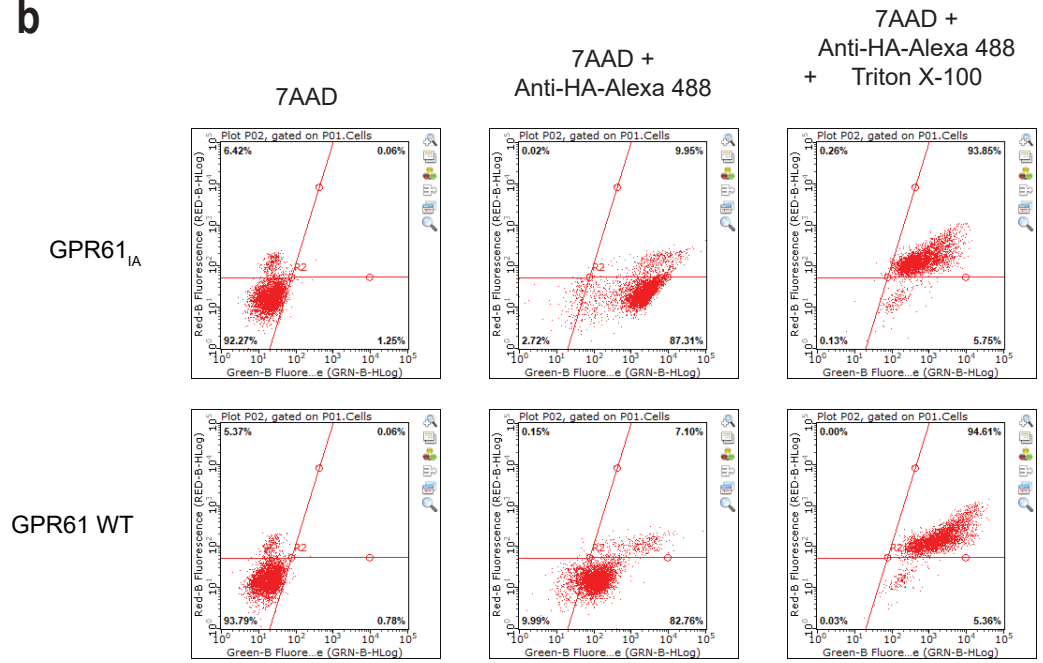

**c**

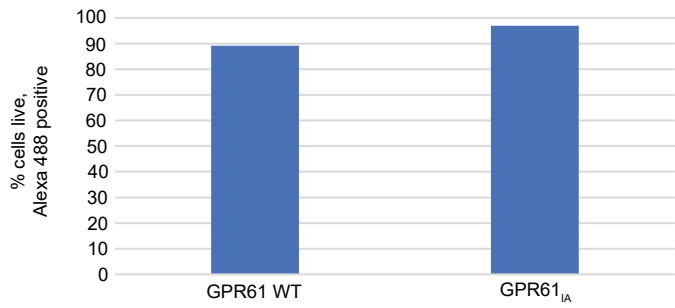

**d**

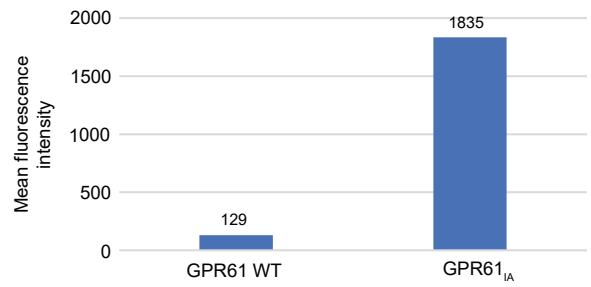

# Supplementary Figure 5

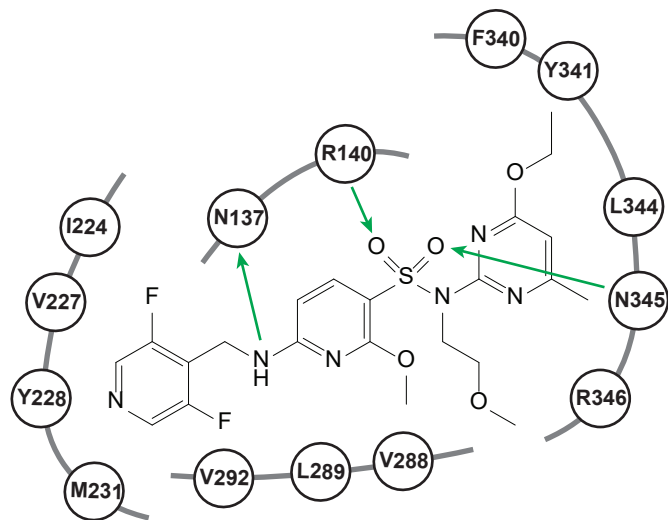

# Supplementary Figure 6

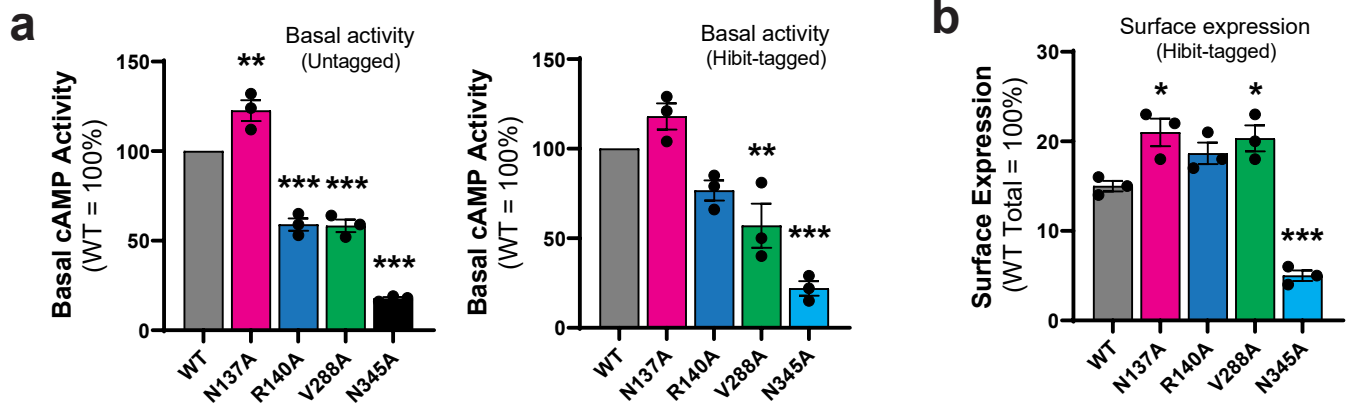

# Supplementary Figure 7

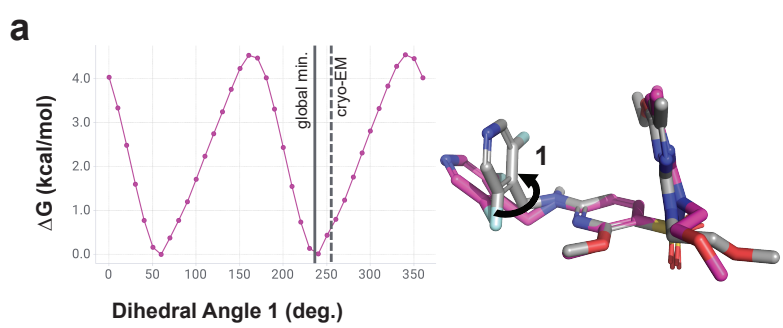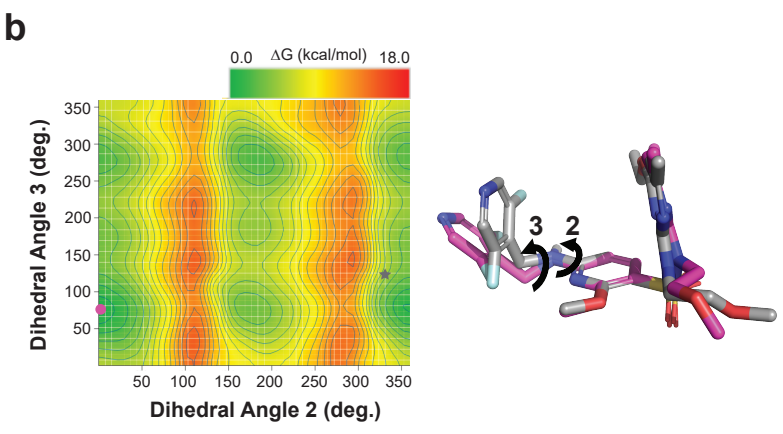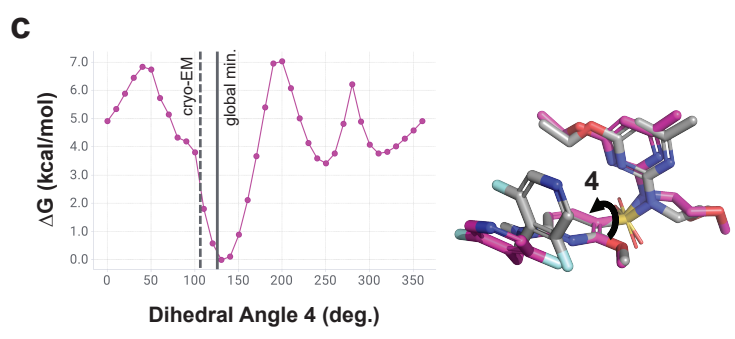





# Supplementary Figure 9

**a**

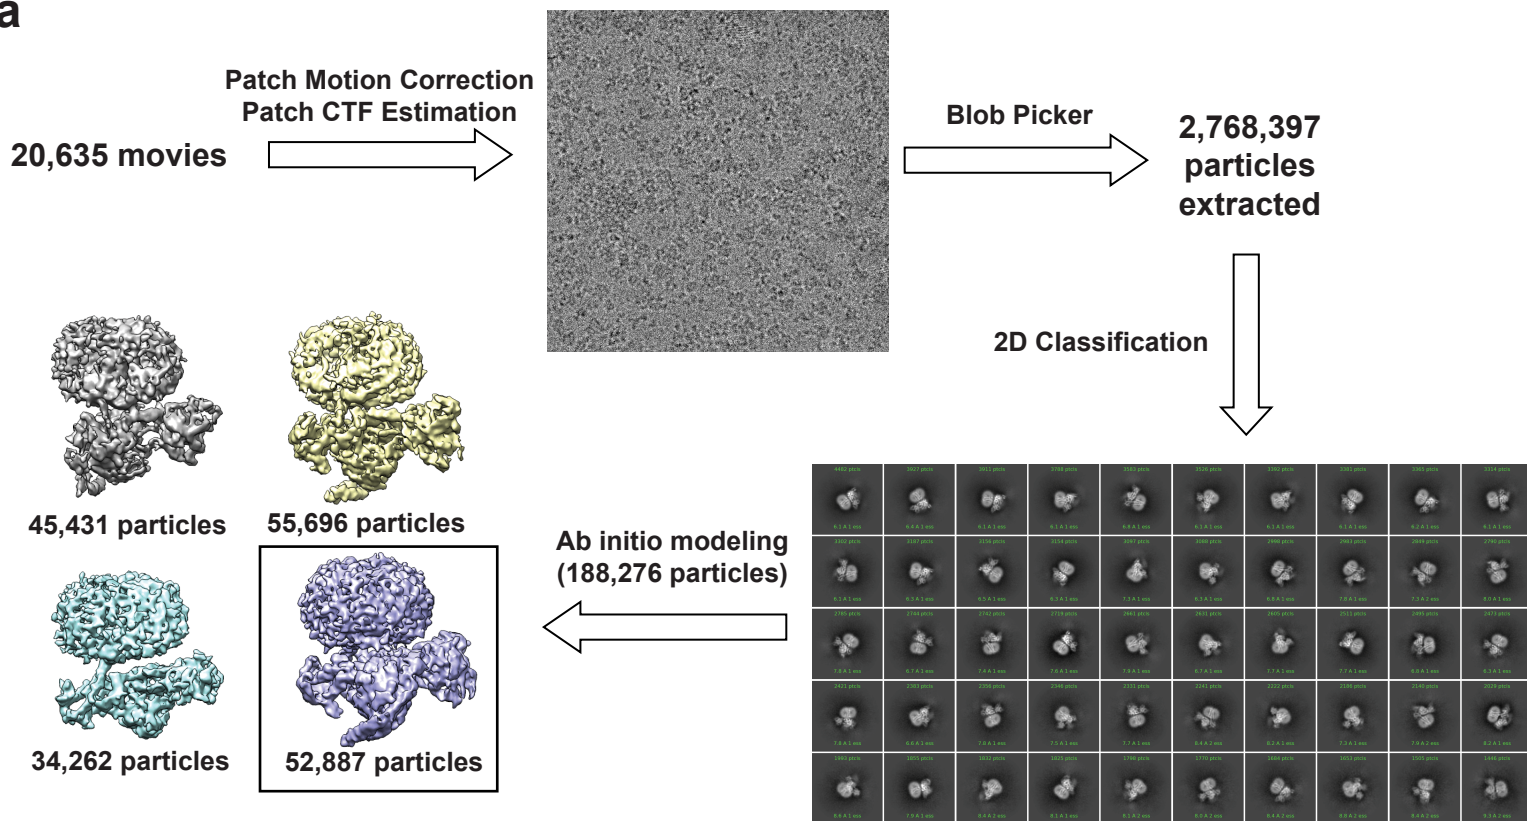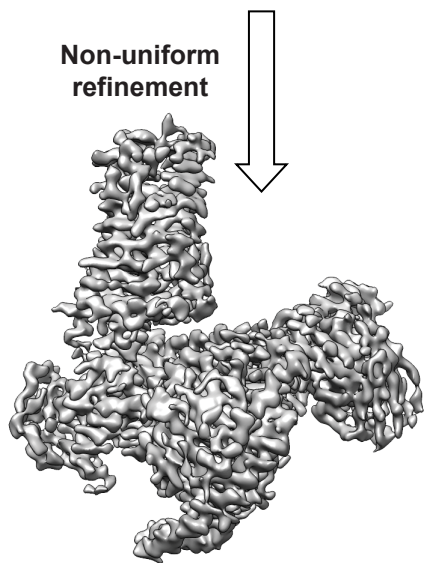

**b**

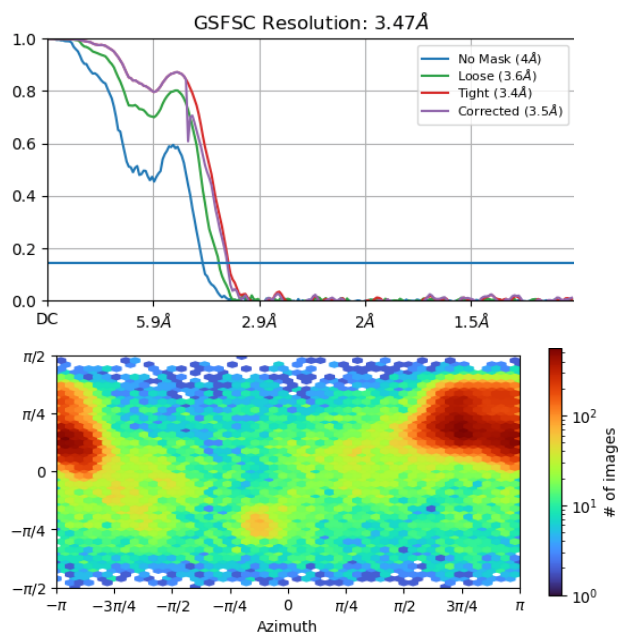

**c**

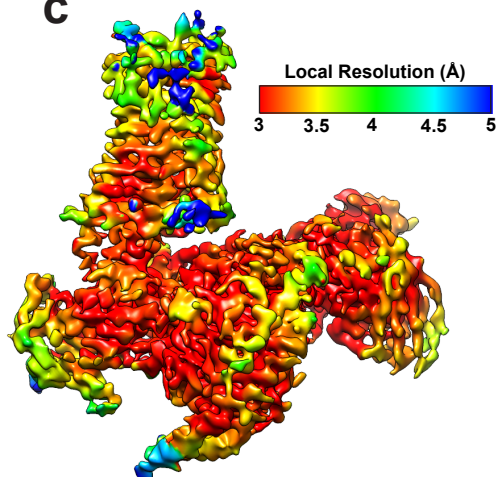

**d**

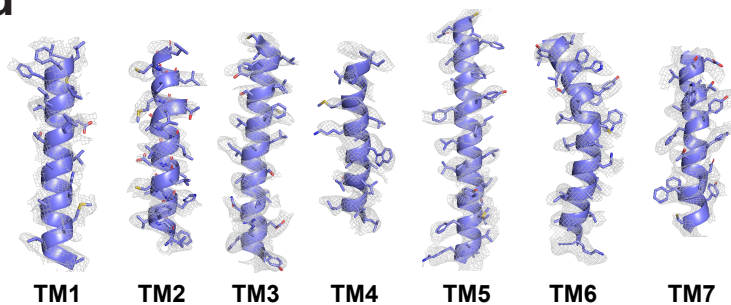

# Supplementary Figure 10

**a**

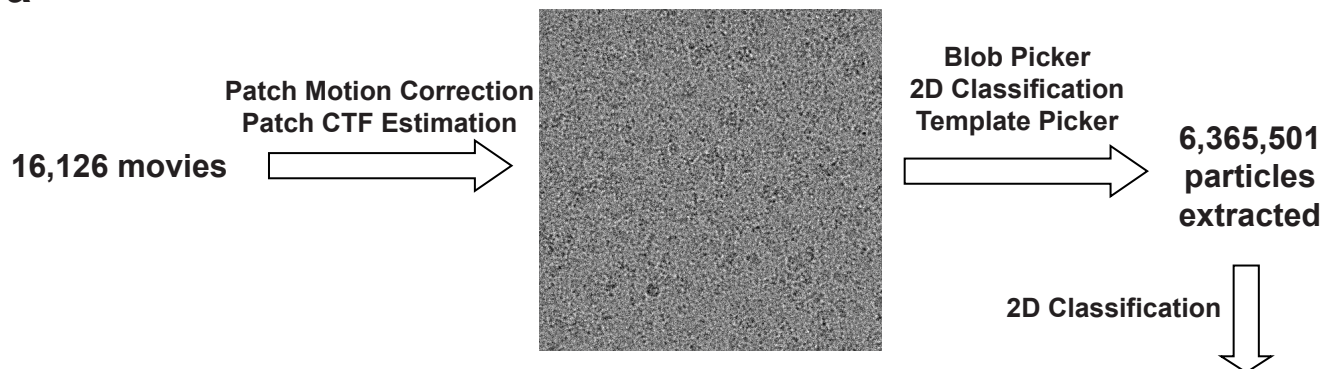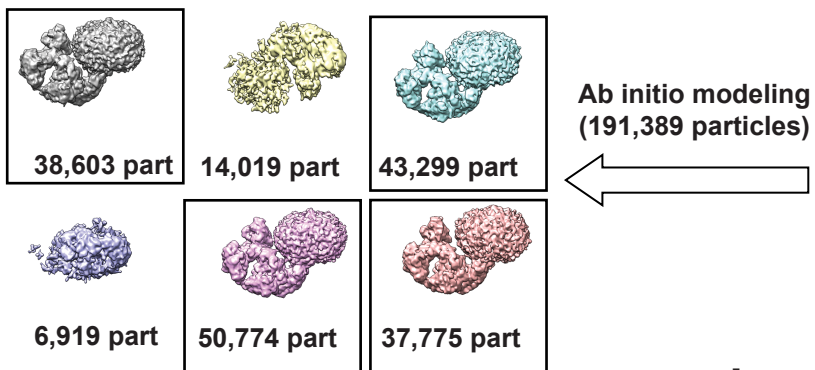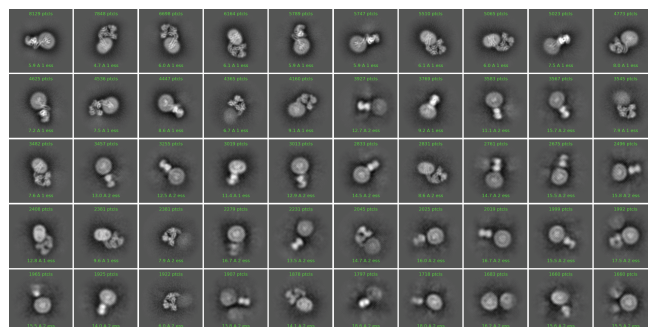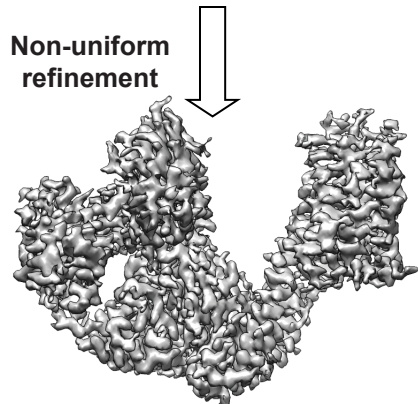

**b**

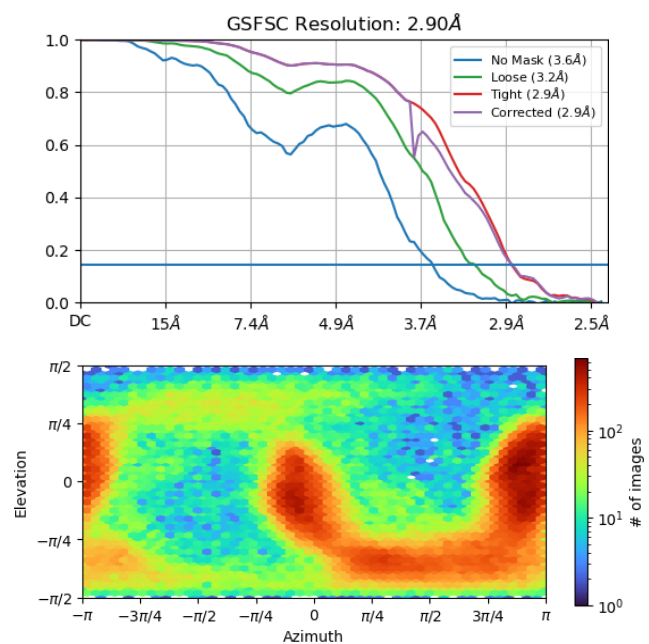

**c**

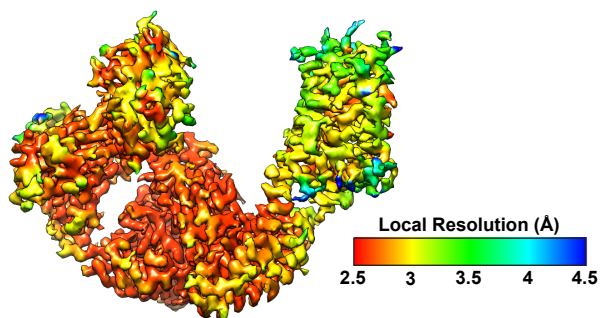

**d**

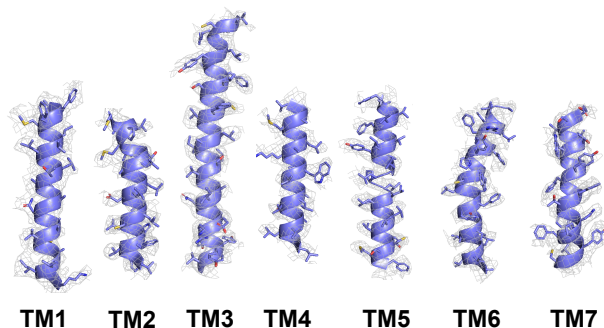

**e**

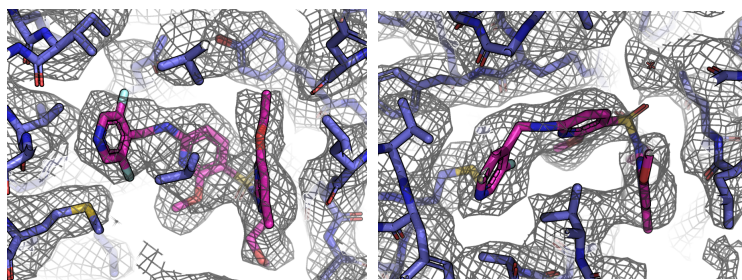

# Supplementary Figure 11

**a**

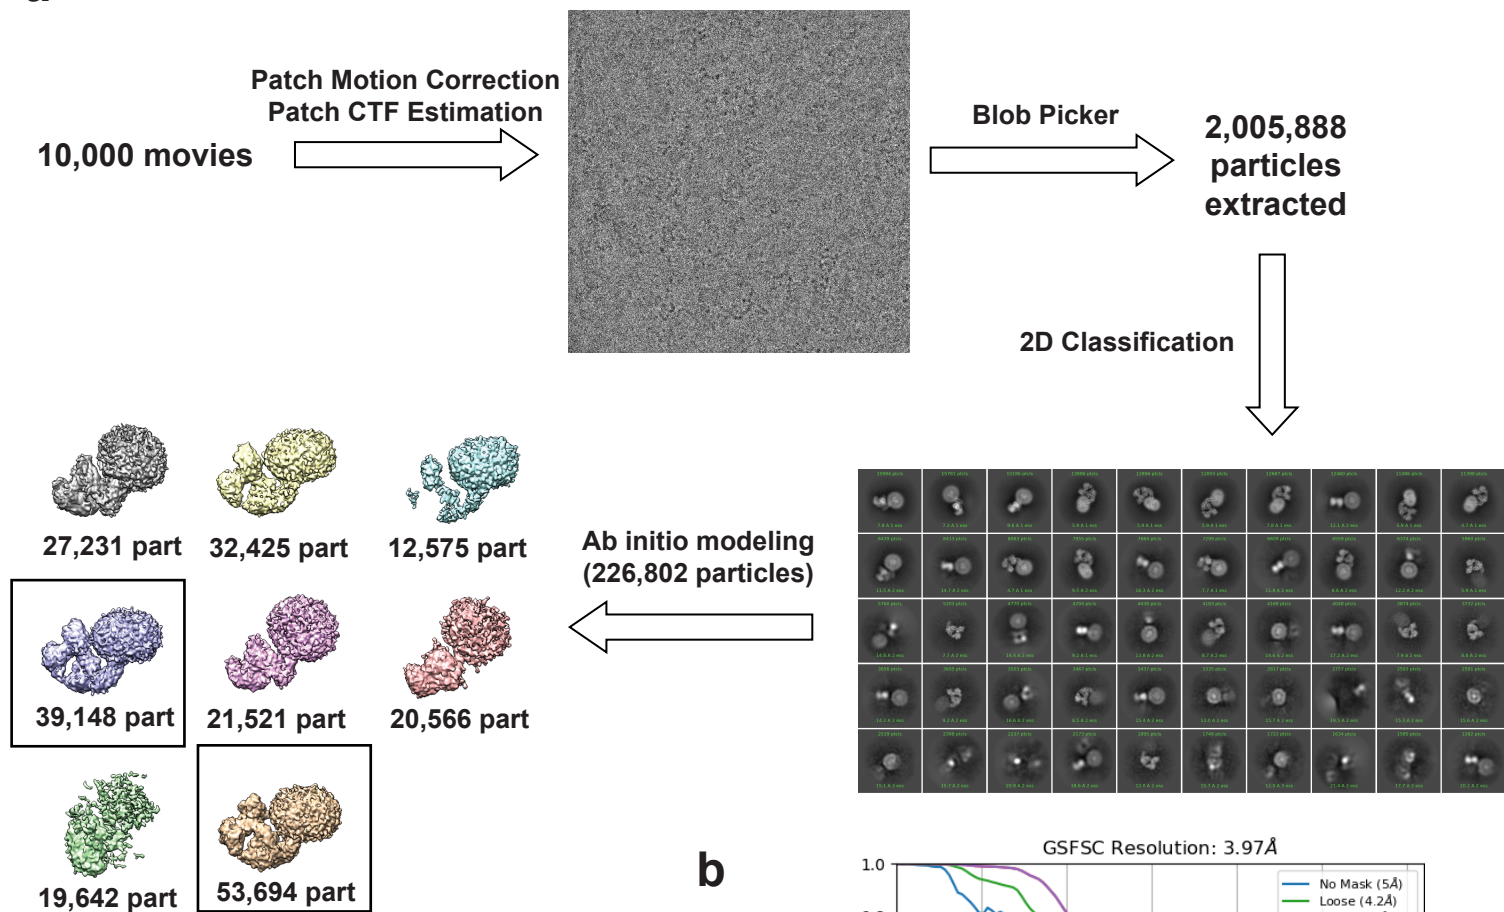

**b**

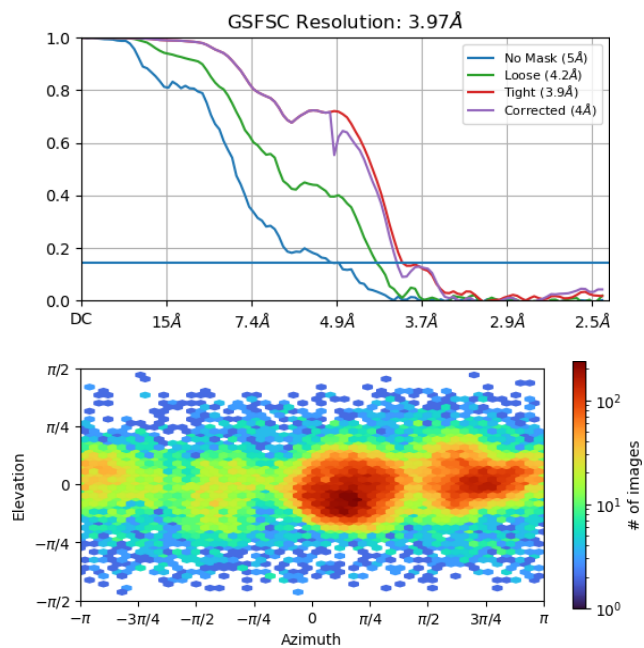

**c**

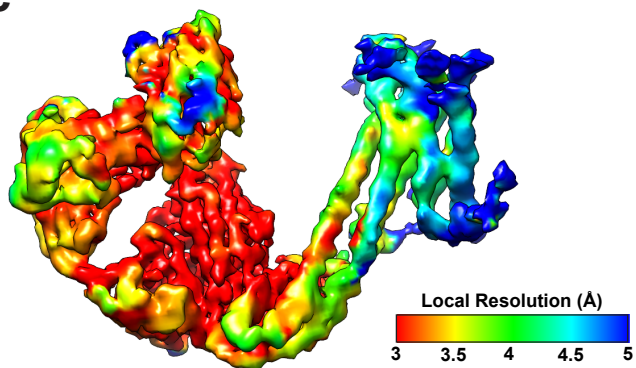

**d**

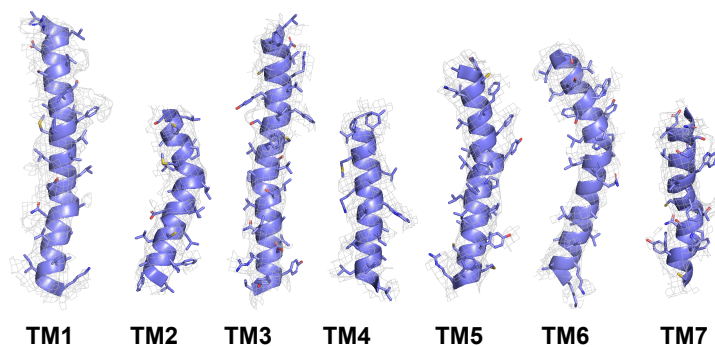

Supplement: 41467_2023_41646_MOESM1_ESM.pdf [file 41467_2023_41646_MOESM1_ESM.pdf]
